# Supplementary material
Source: Springer Nature journal article supplement (https://www.springermedizin.de/resource/supplementary/12958_2011_949_MOESM2_ESM.pdf/9566452)
Supplement: MOESM2 [file 9566452]

TMA 251

10/9/03 6

JHU TMA LAB

TMA 252

10/9/03 17

JHU TMA LAB

Handwritten notes on a lined paper insert, including a list of items and a small table with colored dots.

Handwritten notes on a lined paper insert, including a list of items and a small table with colored dots.
